# Supplementary material for: Light-Activated Monomethyl Auristatin E Prodrug Nanoparticles for Combinational Photo-Chemotherapy of Pancreatic Cancer
Source: MDPI journal article supplement (doi:10.3390/molecules27082529), 2022-04-14
Supplement: s1 [file s1]

## Supplementary Information for

### Light-Activated Monomethyl Auristatin E Prodrug Nanoparticles for Combinational Photo-Chemotherapy of Pancreatic Cancer

In Kyung Cho<sup>1,2,3</sup>, Man Kyu Shim<sup>2</sup>, Wooram Um<sup>4</sup>, Jong-Ho Kim<sup>3</sup> and Kwangmeyung Kim<sup>2,5,\*</sup>

<sup>1</sup>Laboratory Animal Resource Center, Korea Research Institute of Bioscience and Biotechnology, Cheongju 28116, Korea; cik@kribb.re.kr

<sup>2</sup>Biomedical Research Institute, Korea Institute of Science and Technology, Seoul 02792, Korea; mks@kist.re.kr

<sup>3</sup>Department of Pharmaceutical Science, College of Pharmacy, Kyung Hee University, 26 Kyungheedaero, Dongdaemun-gu, Seoul 02447, Korea; jonghokim@khu.ac.kr

<sup>4</sup>School of Chemical Engineering, College of Engineering, Sungkyunkwan University, Suwon 16419, Korea; tings0609@nate.com

<sup>5</sup>KU-KIST Graduate School of Converging Science and Technology, Korea University, Seoul 02841, Korea

<sup>#</sup>These authors contributed equally to this work.

\*Correspondence and requests for materials should be addressed to **K. Kim** (E-mail: kim@kist.re.kr; address: Biomedical Research Institute, Korea Institute of Science and Technology (KIST), Seoul, 02792, Republic of Korea).

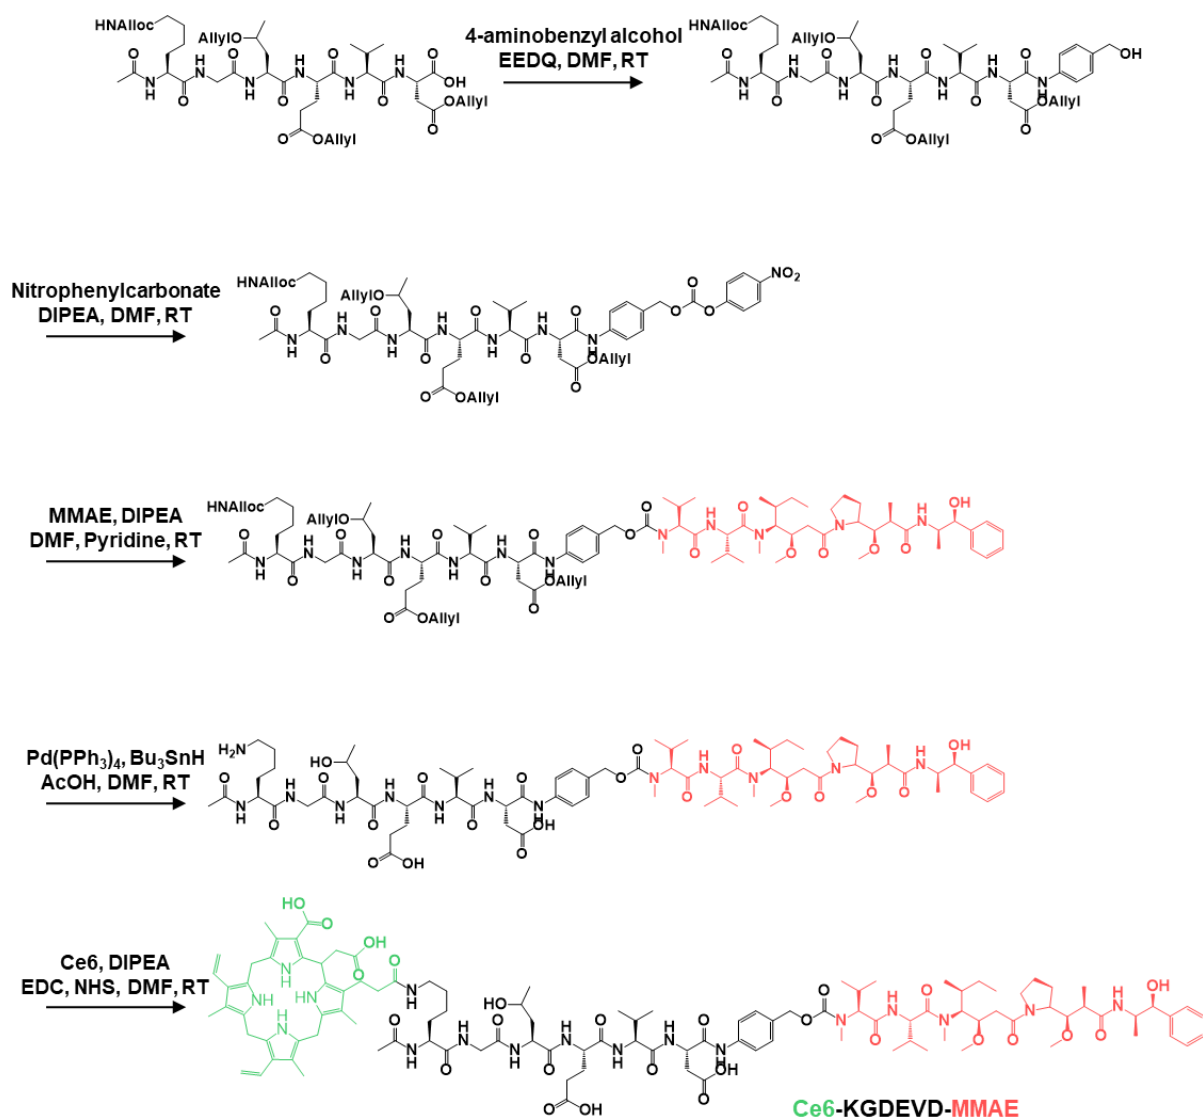

**Figure S1.** Synthetic route to prepare light-activated MMAE prodrugs (CDM).

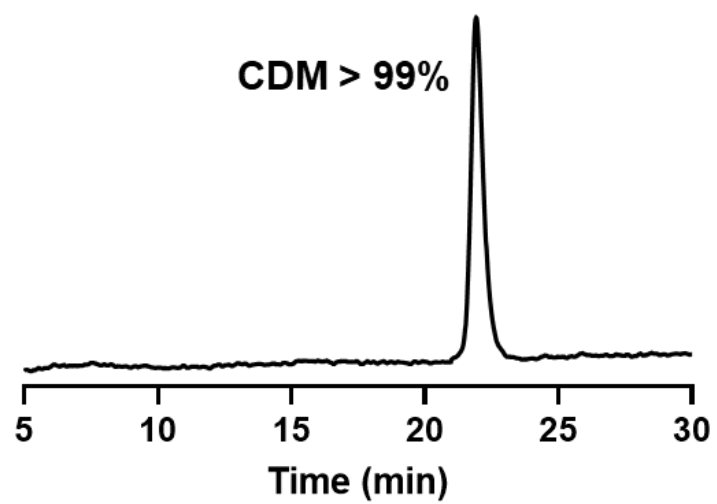

**Figure S2.** The purity of CDM after preparation, confirmed *via* the HPLC.

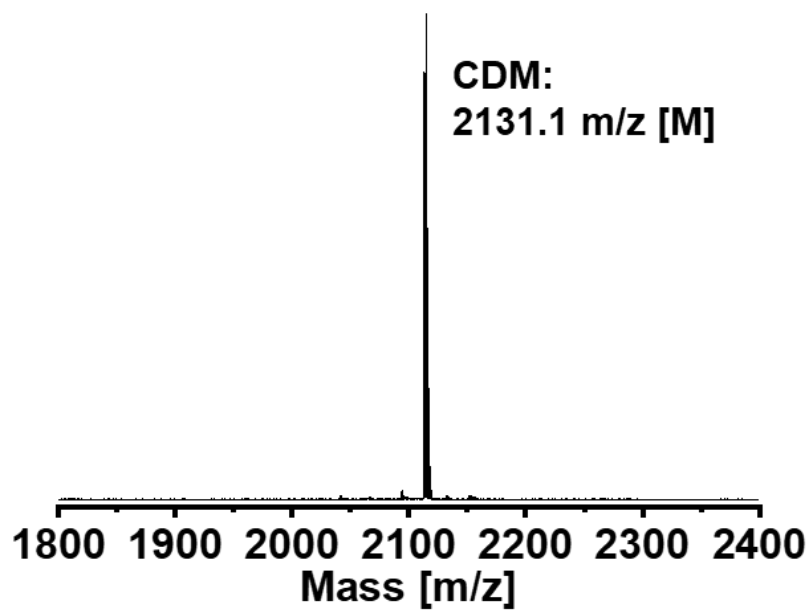

**Figure S3.** The exact molecular weight of CDM was calculated to be 2131.1 Da and measured to be 2131.1 m/z [M], which was confirmed via the MALDI-TOF mass spectrometer.

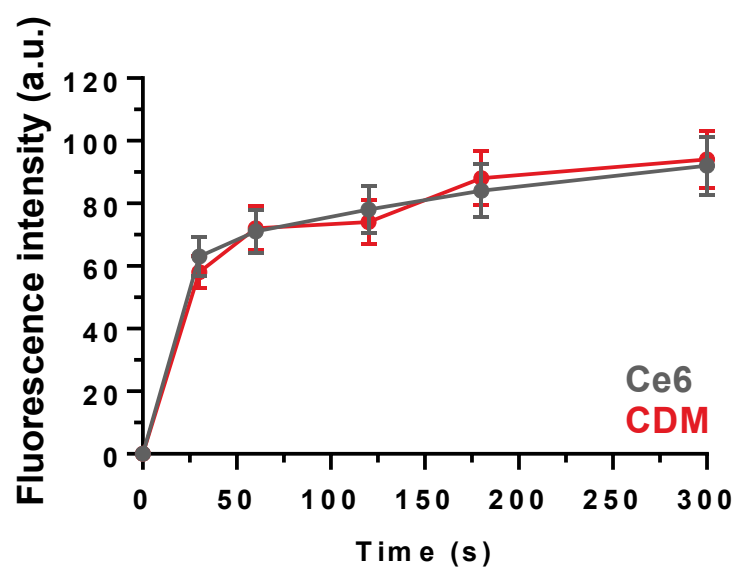

**Figure S4.** Singlet oxygen generation from Ce6 and CDM under visible light irradiation, as confirmed via the Singlet Oxygen Sensor Green (SOSG) assays.

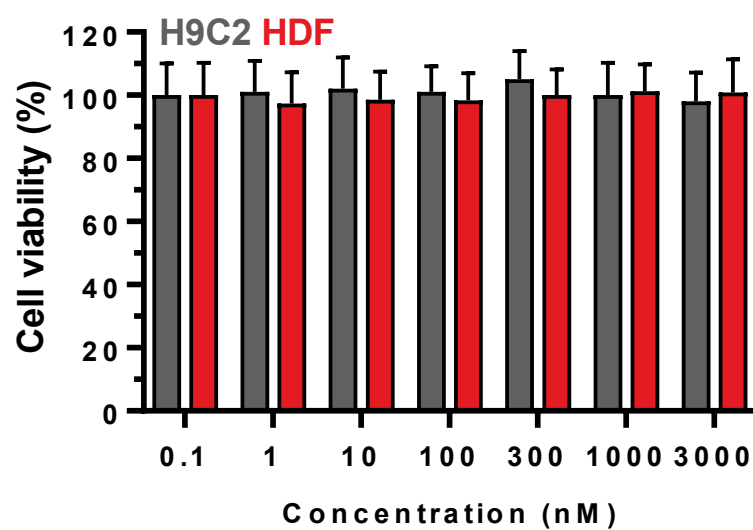

**Figure S5.** The viability of H9C2 and HDF cells after treatment of CDM in absence of visible light.

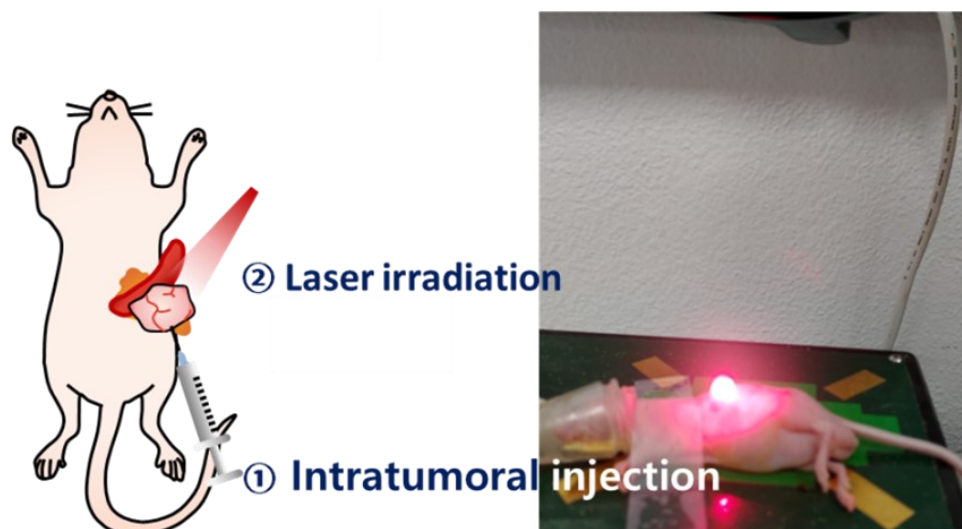

**Figure S6.** The photos to show the procedure of visible light irradiation for *in vivo* experiments.
